# Supplementary material for: A Need for Context-Based Conservation: Incorporating Local Knowledge to Mitigate Livestock Predation by Large Carnivores
Source: Frontiers journal article supplement (doi:10.3389/fcosc.2021.766086), 2021-11-25
Supplement: Data_Sheet_1.PDF [file Data_Sheet_1.PDF]

## Supplementary Material 1: Instances of livestock depredation in Ladakh between January-June 2020

**Table 1.** Table collated by the Wildlife Protection Department with information regarding number (#) of livestock lost during a depredation event by either wolf or snow leopards.

| Date       | Village Name  | Predator Involved | # of Goat | # of Sheep | # of Yak | # of Cow | # of Horses |
|------------|---------------|-------------------|-----------|------------|----------|----------|-------------|
| 20.01.2020 | Tiri          | Wolf              | 0         | 0          | 3        | 0        | 0           |
| 23.01.2020 | Kumdok        | Snow Leopard      | 0         | 0          | 4        | 0        | 0           |
| 24.01.2020 | Kungyam       | Snow Leopard      | 0         | 0          | 0        | 0        | 1           |
| 24.01.2020 | Kumdok        | Snow Leopard      | 0         | 0          | 0        | 1        | 0           |
| 02.02.2020 | Tukla Phulak  | Snow Leopard      | 0         | 0          | 3        | 0        | 0           |
| 08.02.2020 | Tukla         | Snow Leopard      | 0         | 0          | 0        | 1        | 0           |
| 10.02.2020 | Tukla         | Snow Leopard      | 0         | 0          | 0        | 1        | 0           |
| 20.02.2020 | Tiri Thang    | Wolf              | 0         | 0          | 0        | 0        | 2           |
| 13.03.2020 | Kherapulu     | Wolf              | 22        | 20         | 0        | 0        | 0           |
| 18.03.2020 | Sumdoo TR     | Snow Leopard      | 3         | 2          | 0        | 0        | 0           |
| 18.03.2020 | Sumdoo TR     | Snow Leopard      | 0         | 0          | 1        | 0        | 0           |
| 31.03.2020 | Satoo Kargyam | Wolf              | 0         | 0          | 1        | 0        | 0           |
| 04.04.2020 | Sumdoo TR     | Snow Leopard      | 0         | 6          | 0        | 0        | 0           |
| 12.04.2020 | Liktsey       | Snow Leopard      | 0         | 0          | 0        | 1        | 0           |
| 12.04.2020 | Sumdoo TR     | Snow Leopard      | 8         | 16         | 0        | 0        | 0           |
| 21.04.2020 | Sumdoo TR     | Snow Leopard      | 1         | 0          | 8        | 0        | 0           |
| 21.04.2020 | Sumdoo TR     | Snow Leopard      | 2         | 9          | 0        | 0        | 0           |
| 21.04.2020 | Sumdoo TR     | Snow Leopard      | 2         | 5          | 0        | 0        | 2           |
| 22.04.2020 | Sumdoo TR     | Snow Leopard      | 5         | 0          | 0        | 0        | 0           |
| 22.04.2020 | Sumdoo TR     | Snow Leopard      | 4         | 0          | 0        | 0        | 0           |
| 22.04.2020 | Sumdoo TR     | Snow Leopard      | 0         | 0          | 2        | 0        | 0           |
| 24.04.2020 | Sumdoo TR     | Snow Leopard      | 15        | 16         | 0        | 0        | 0           |
| 25.04.2020 | Sumdoo TR     | Snow Leopard      | 3         | 5          | 0        | 0        | 0           |
| 23.05.2020 | Muklab        | Wolf              | 6         | 0          | 0        | 0        | 0           |

Each row represents a separate herd of livestock.

Page 10 of 20

## Supplementary Material2: Line drawings of different type of corrals discussed for building in Sumdo TR

### Design 1: "Traditional Design"

The traditional structure has an enclosure of 6ft height that can house the livestock with a top cover comprising of a frame made of crate wire mesh.

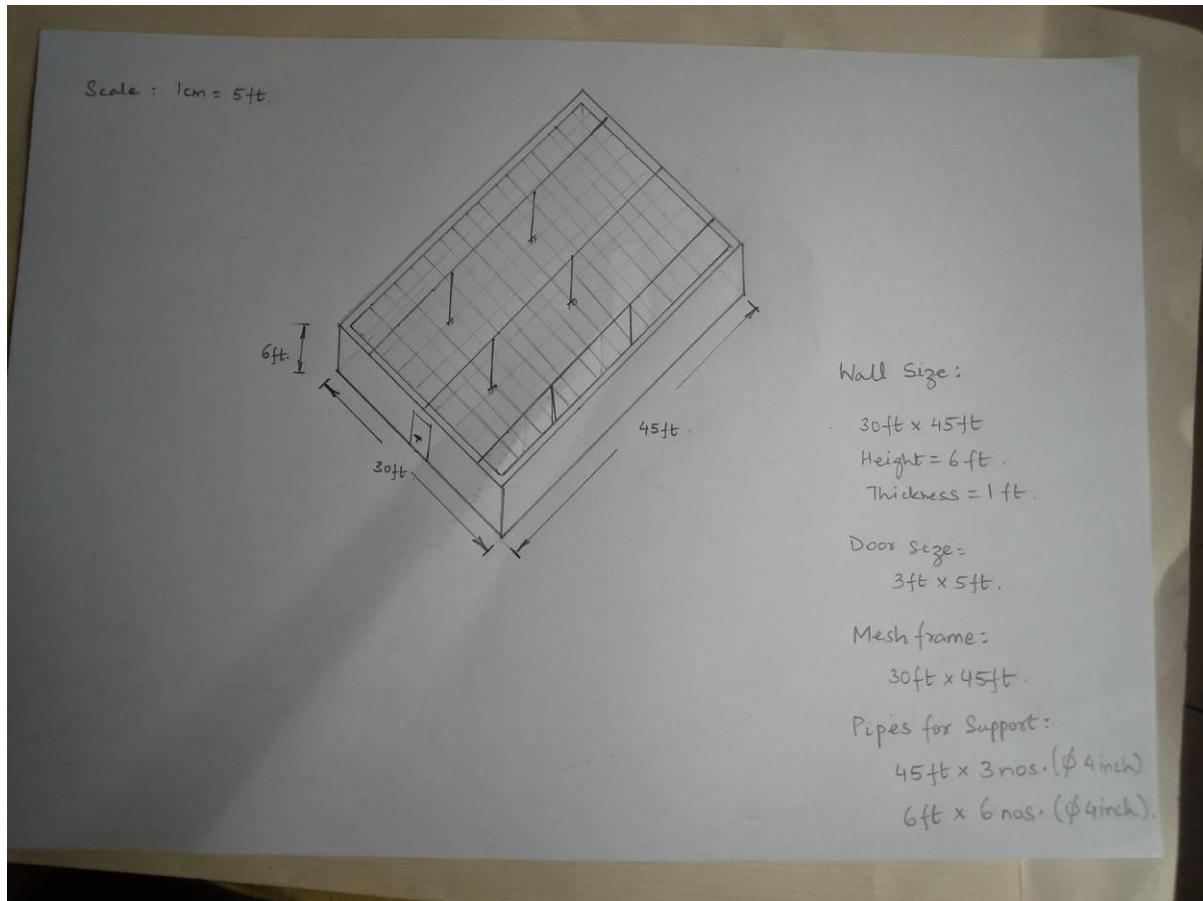

**Figure 1.** Traditional style corral

## Design 2: "Tent Design"

This design is inspired by the shape of a tent in a fashion that it requires less construction, provides better access to sunlight and allows for wind to pass through the structure.

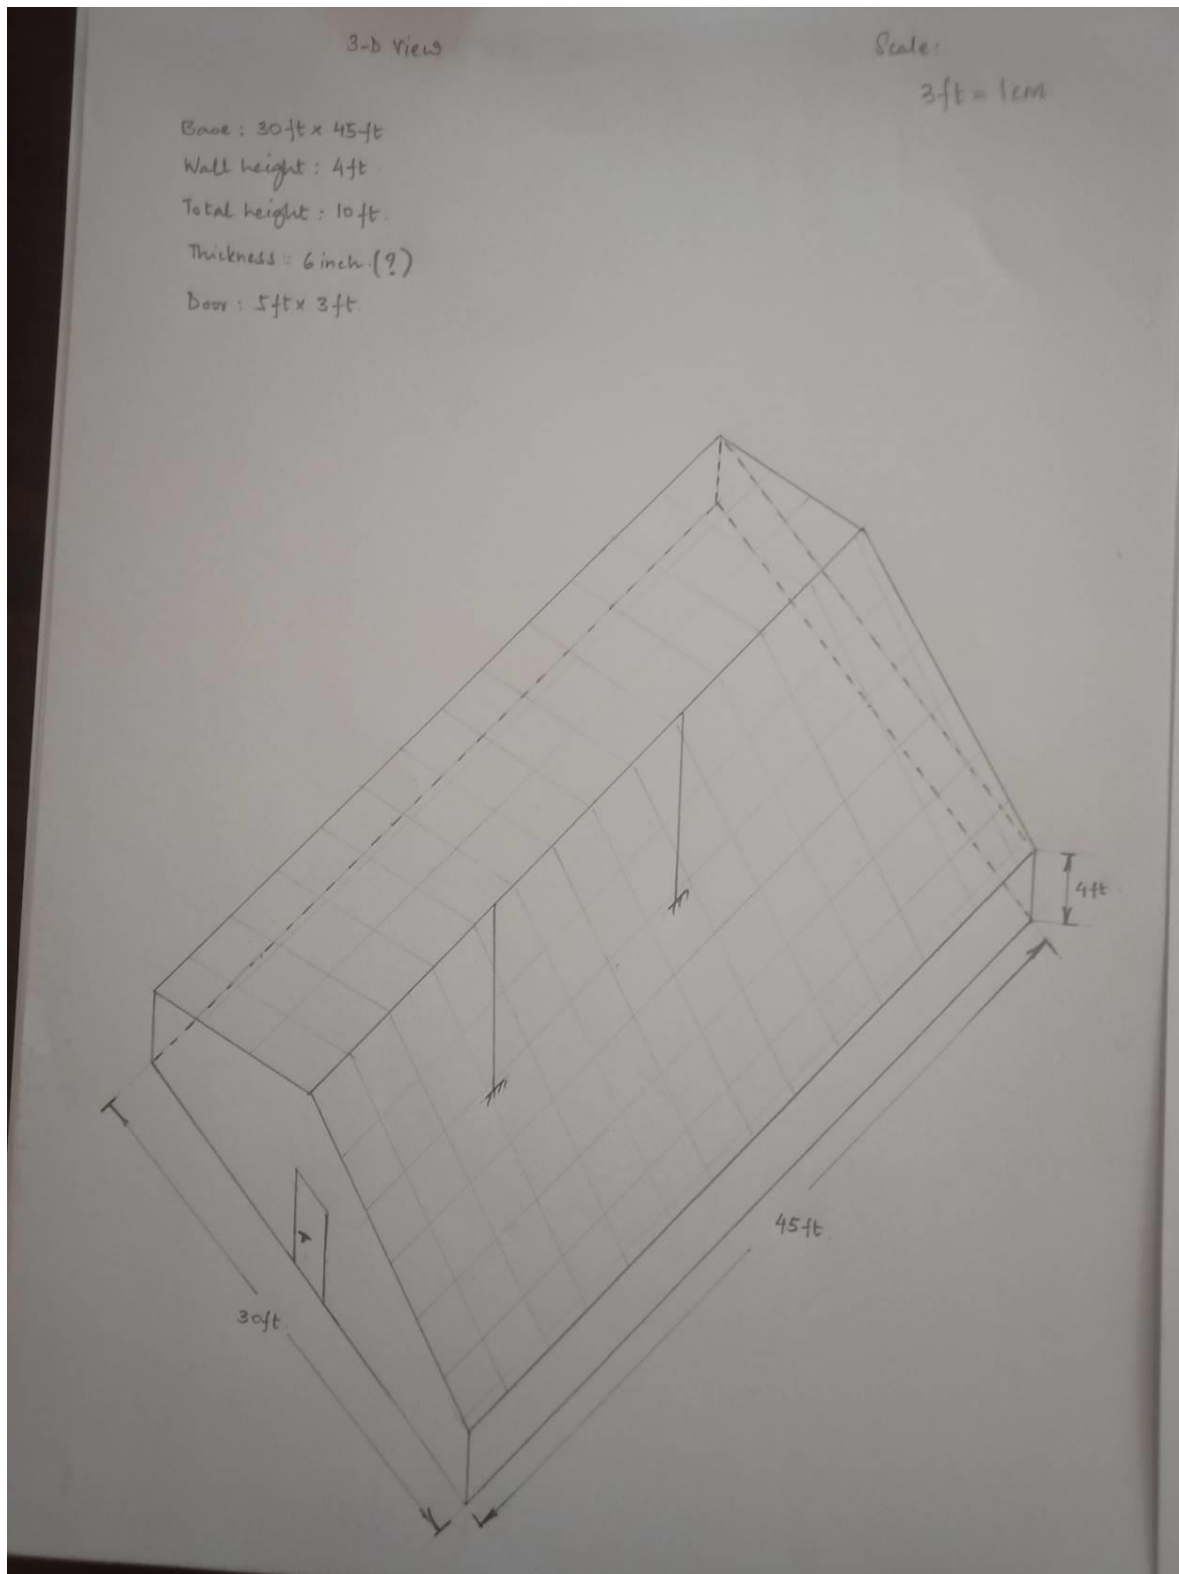

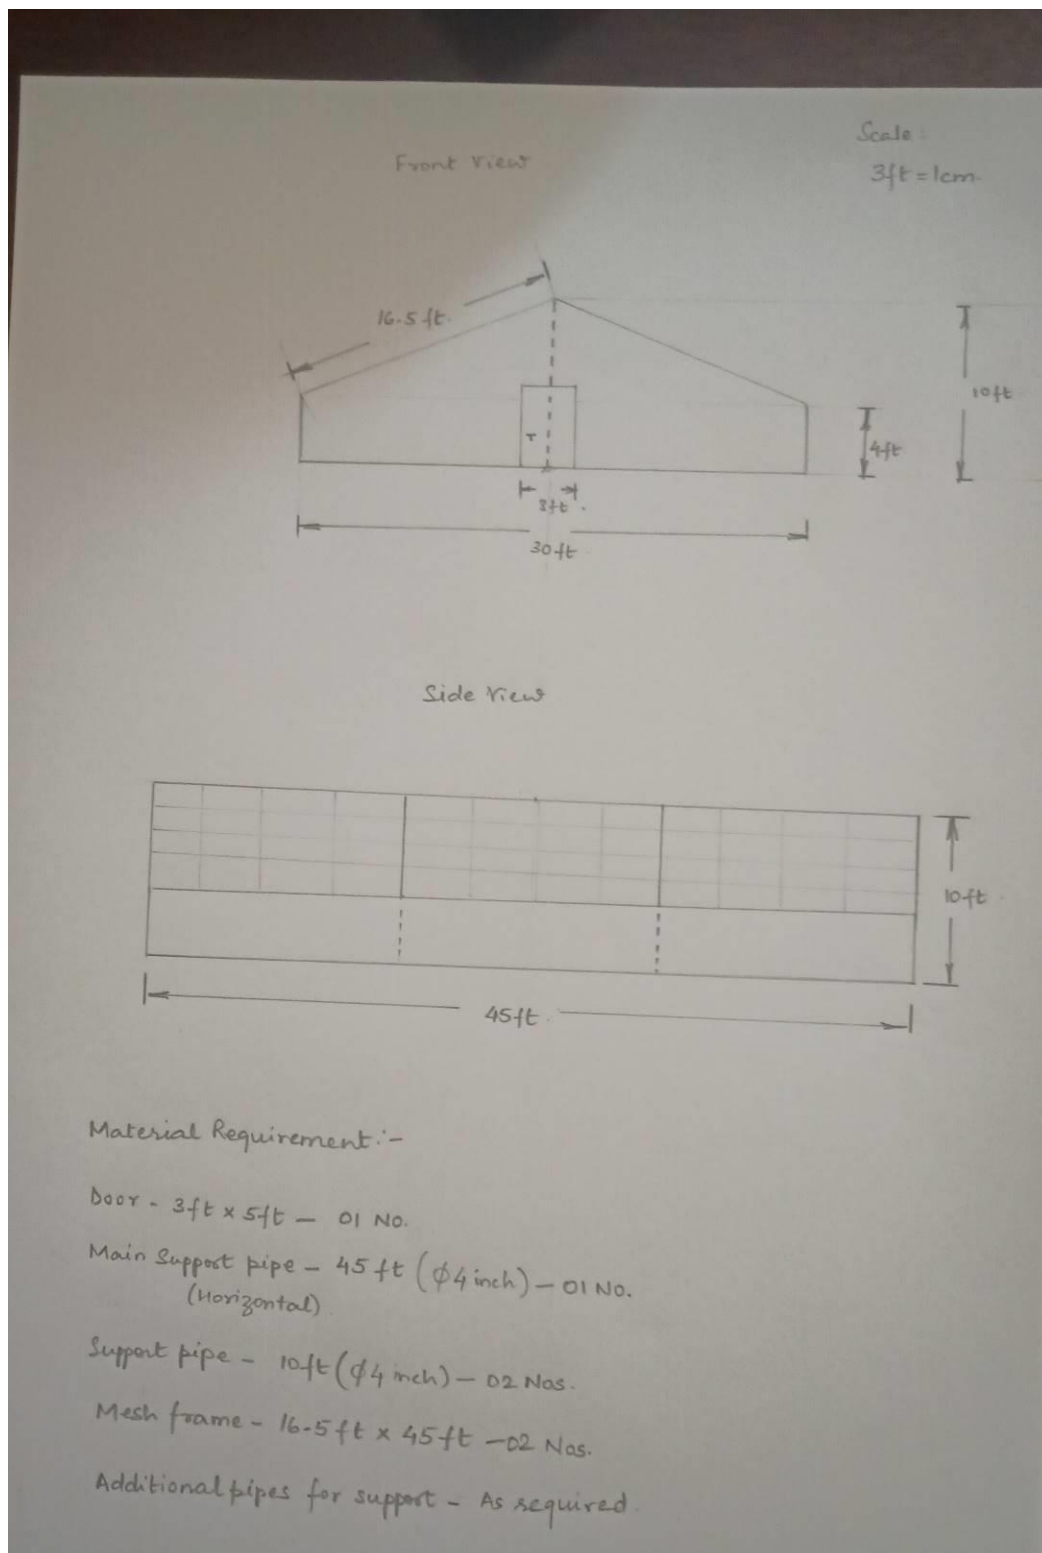

**Figure 2.** Corral design inspired by local herders

### Design 3: "Fenced Design"

This design has been tested successfully in Tost Mountains in Mongolia. This is based on a recent publication (Samelius et al. 2020)

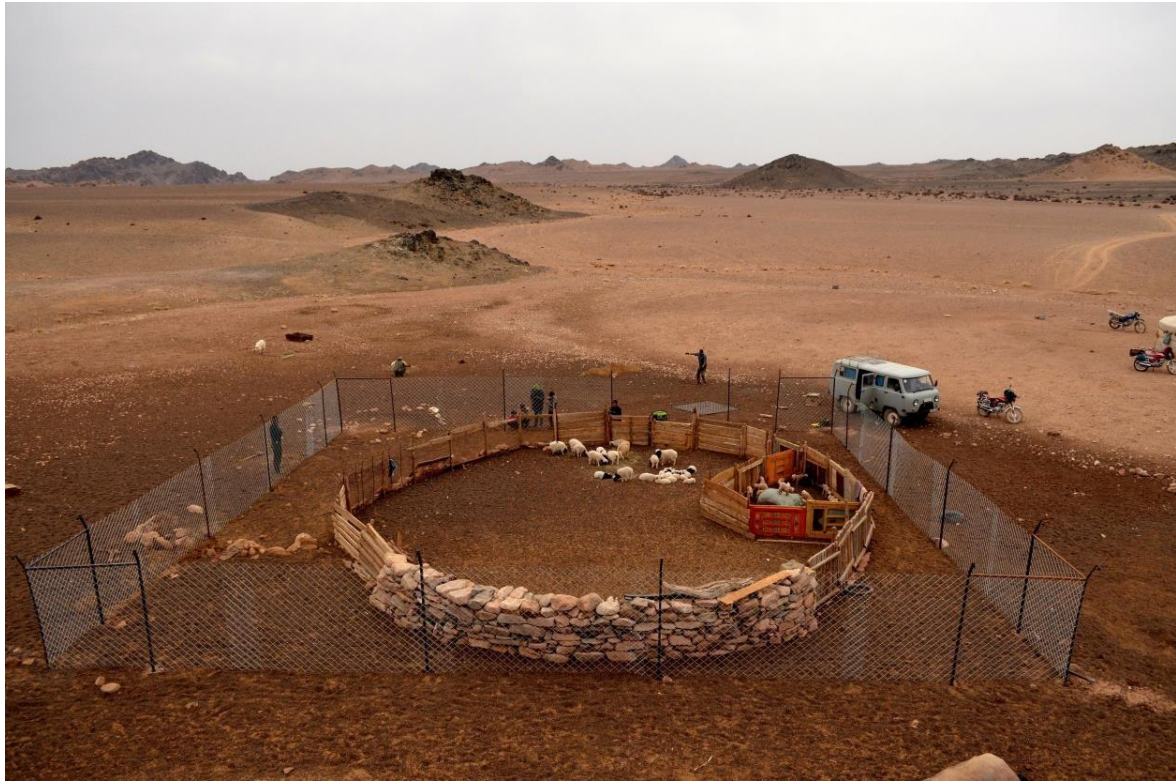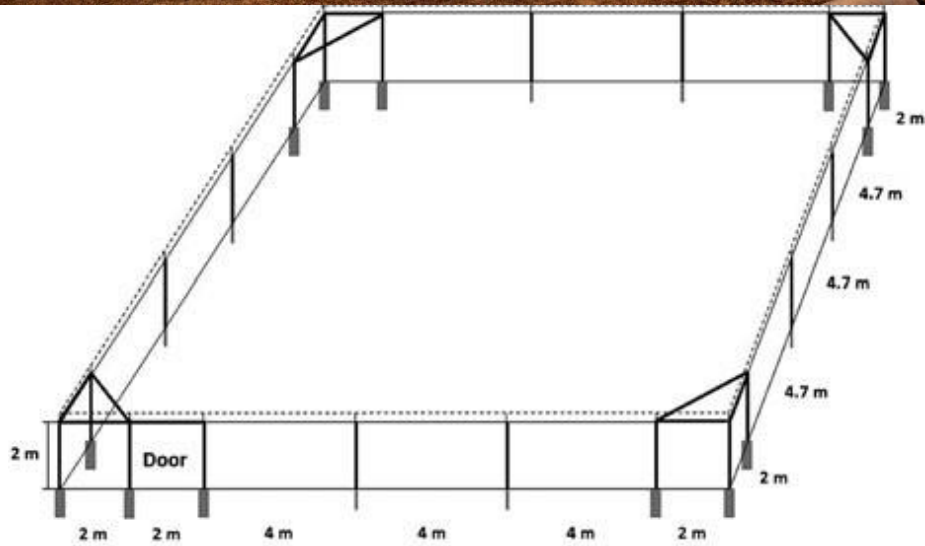

**Figure 3.** Corral design from Mongolia. The dimensions are 60 ft. x 60 ft., with an above ground height of 6.5 ft. 21 angles, of 8.5 ft. each of support
